# Supplementary material for: Child-parent interactions in American and Turkish families: Examining measurement invariance analysis of child-parent relationship scale
Source: PubMed Central journal article supplement (PMC7122811; doi:10.1371/journal.pone.0230831), 2020-04-03
Supplement: pone.0230831.s001.pdf [file pone.0230831.s001.pdf]

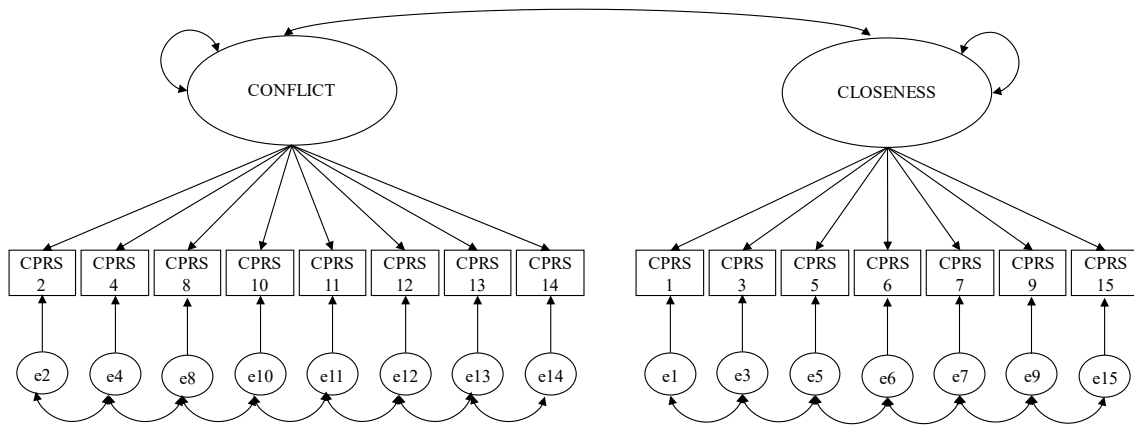

Fig 1. Two-factor structure for the CPRS-SF.
